# Supplementary material for: Synthesis of photoresponsive polymeric propesticide micelles based on PEG for the controlled release of a herbicide
Source: Royal Society of Chemistry journal article supplement (doi:10.1039/c5py01690h), 2015-12-03
Supplement: c5py01690h1.pdf [file c5py01690h1.pdf]

## Electronic Supplementary Information

### Synthesis of photoresponsive polymeric propesticide micelles based on PEG for controlled release of herbicide

Kaikai Ding, Liyan Shi, Ling Zhang, Tian Zeng, Yihua Yin\*, ying yi\*

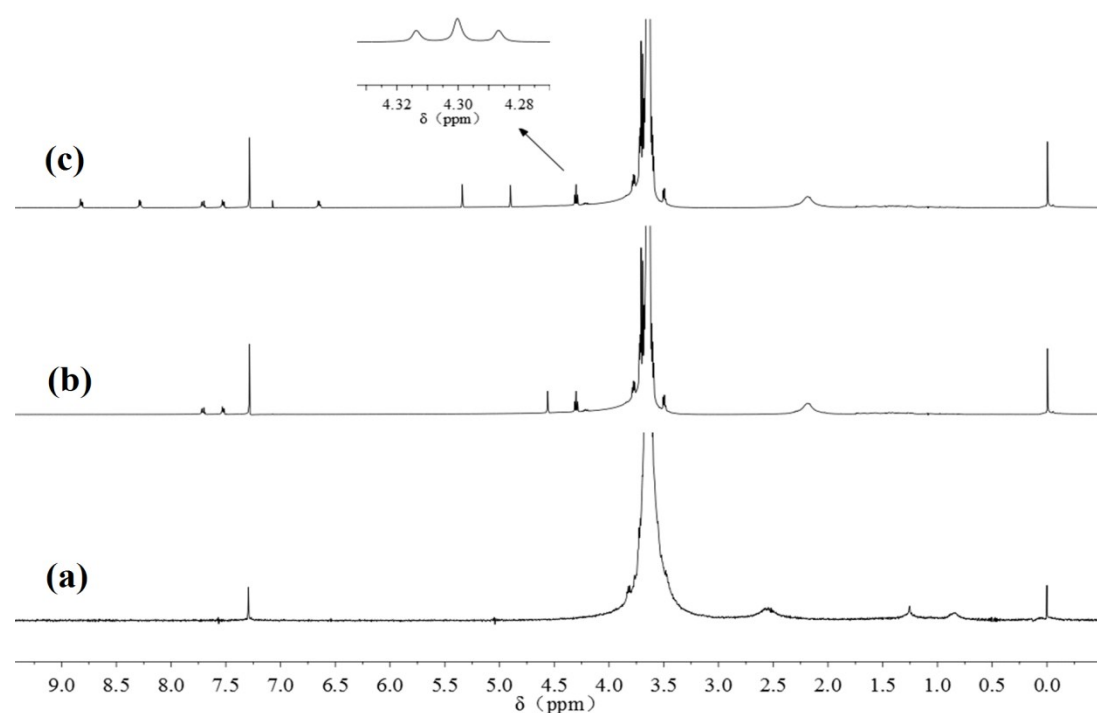

**Fig.S1** <sup>1</sup>H NMR spectra in CD<sub>2</sub>Cl<sub>2</sub> of (a) PEG, (b) NBA-PEG, and (c) 2,4-D-NBA-PEG

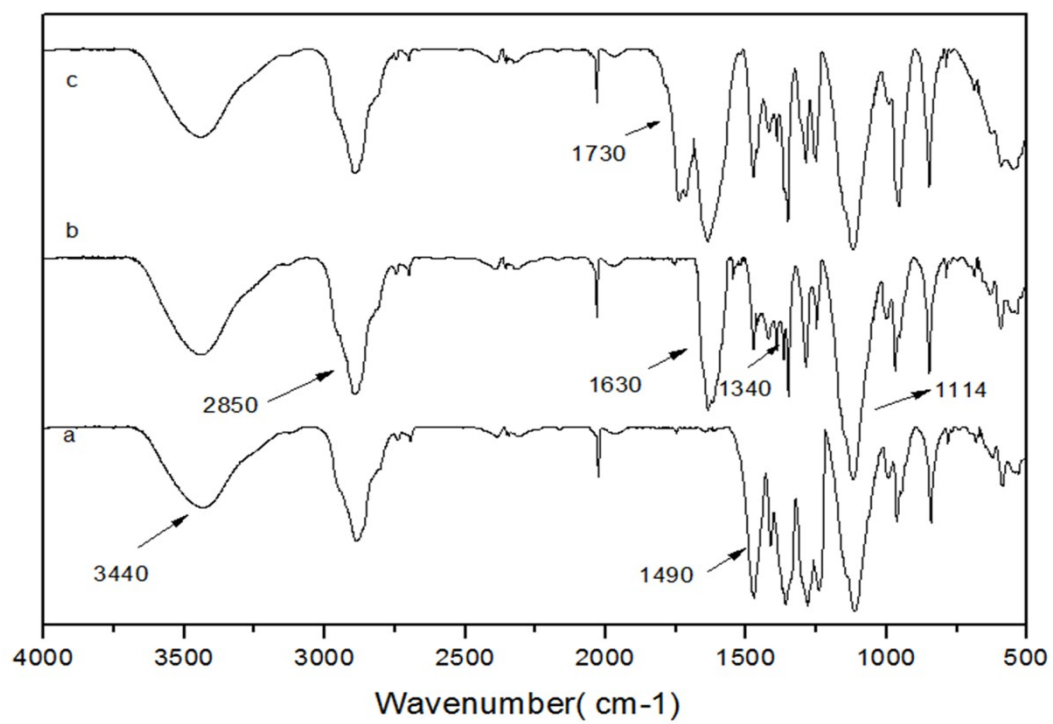

**Fig.S2** FT-IR spectra of (a) PEG, (b) NBA-PEG and (c) 2,4-D-NBA-PEG

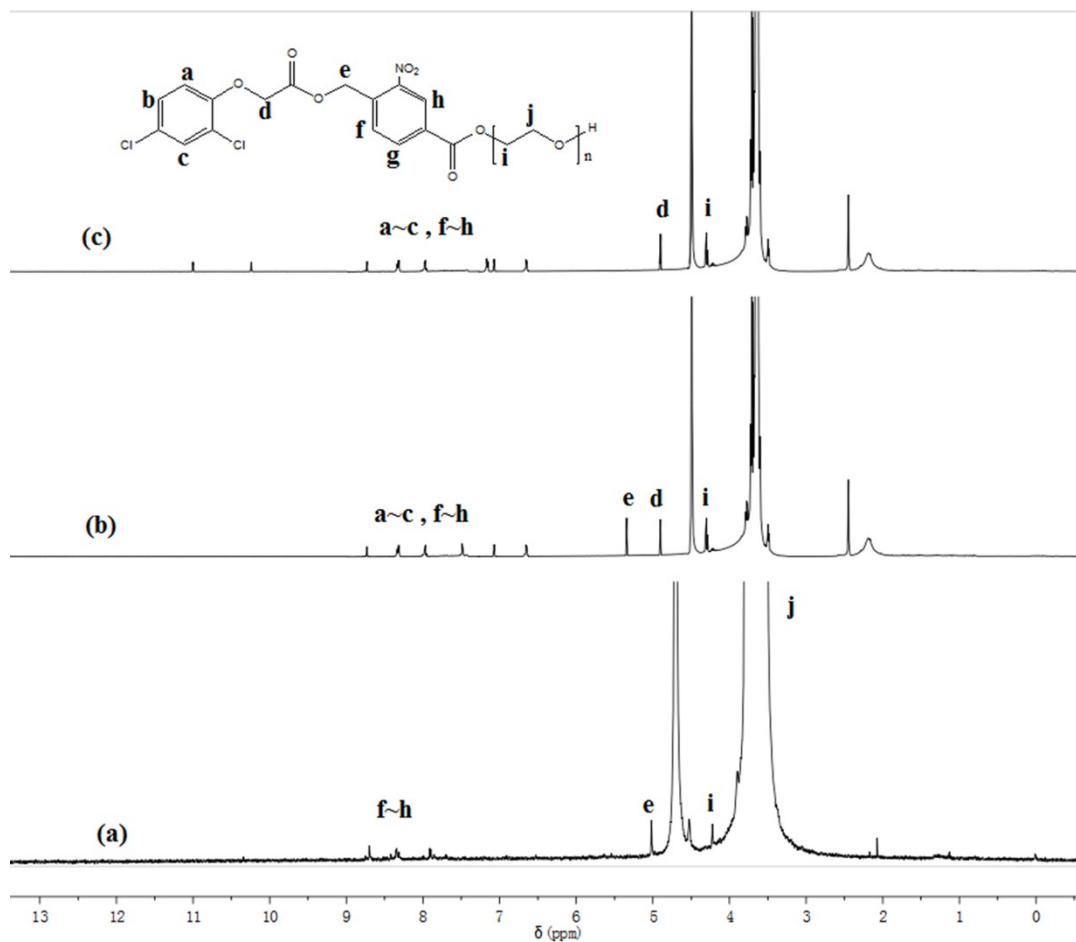

**Fig.S3**  $^1\text{H}$ NMR spectrum of 2,4-D-NBA-PEG in different solvents or treatment conditions: (a) in  $\text{D}_2\text{O}$ ; (b) in  $\text{DMSO-d}_6/\text{D}_2\text{O}$  (1:5, v/v); (c) after UV irradiation for 10 min in  $\text{DMSO-d}_6/\text{D}_2\text{O}$  (1:5, v/v).
